# Supplementary material for: Tetramerisation of the CRISPR ring nuclease Crn3/Csx3 facilitates cyclic oligoadenylate cleavage
Source: eLife. 2020 Jun 29;9:e57627. doi: 10.7554/eLife.57627 (PMC7371418; doi:10.7554/eLife.57627)
Supplement: Figure 2—source data 1. [file elife-57627-fig2-data1.xlsx]

## Sheet: AfCsx3 single-turnover 1-3
AfCsx3 technical replicate 1
cA4	Area	Mean	Min	Max		Time (min)	Uncut cA4 (adjusted for background and area)	Cut A2>P (adjusted for background and area)	A2-P (adjusted for background and area)	Fraction cut (cut/(cut+uncut))	cA4 cut compared to control	Fraction of cA4 converted to A2-P				Fraction cA4 cut (cut/(cut+uncut))
background	8.051e-06	7.759	2.328e-05	168.36		cntrl (10)	1.15962e+08	1.75858e+06	179832	0.0164411	0	0.00152529				Time (min)	R1	R2	R3	Average	SD
cntrl (600)	8.051e-06	941.369	4.365	3646.86		0.166667	7.01806e+07	4.04661e+06	4.02096e+06	0.103102	0.394797	0.0513873
10	8.051e-06	572.783	2.355	2319.56		0.25	4.19704e+07	4.17427e+06	4.76074e+06	0.175522	0.638067	0.0935212				cntrl (10)	0.0164411	0.0204057	0.0158071	0.0175513	0.00249223
15	8.051e-06	345.663	0.96	1561.42		0.333333	3.32923e+07	4.38845e+06	5.69622e+06	0.232489	0.712904	0.131319				0.166667	0.103102	0.185297	0.165912	0.151437	0.0429666
20	8.051e-06	275.795	0.121	1352.33		0.416667	3.59616e+07	5.99758e+06	9.13422e+06	0.296159	0.689884	0.178775				0.25	0.175522	0.251432	0.25071	0.225888	0.04362
25	8.051e-06	297.286	0.788	1297.53		0.5	2.19491e+07	5.13064e+06	7.77923e+06	0.370346	0.810722	0.223163				0.333333	0.232489	0.374672	0.335969	0.314377	0.0735096
30	8.051e-06	184.471	0.153	1009.95		0.583333	1.63155e+07	5.18797e+06	8.46148e+06	0.455514	0.859303	0.282379				0.416667	0.296159	0.461396	0.450065	0.40254	0.0923023
35	8.051e-06	139.115	0.18	751.991		0.666667	1.79497e+07	6.97234e+06	1.25238e+07	0.520649	0.845211	0.334451				0.5	0.370346	0.50321	0.503685	0.45908	0.0768468
40	8.051e-06	152.272	0.267	708.958		0.75	1.05678e+07	5.61708e+06	1.01648e+07	0.59894	0.908869	0.385765				0.583333	0.455514	0.615233	0.613113	0.561287	0.0916079
45	8.051e-06	92.84	0.063	451.188		0.833333	8.50789e+06	5.58237e+06	1.02683e+07	0.650723	0.926632	0.421549				0.666667	0.520649	0.677579	0.67824	0.62549	0.090795
50	8.051e-06	76.256	0.047	444.855		0.916667	9.22979e+06	8.06307e+06	1.55215e+07	0.718727	0.920407	0.47301				0.75	0.59894	0.724172	0.730108	0.684407	0.0740756
55	8.051e-06	82.068	0.003	430.921		1	7.08173e+06	6.43845e+06	1.12862e+07	0.71452	0.938931	0.454972				0.833333	0.650723	0.815474	0.784328	0.750175	0.0875242
60	8.051e-06	64.774	0.101	446.689		1.5	3.15837e+06	6.58942e+06	1.23298e+07	0.856943	0.972764	0.558477				0.916667	0.718727	0.814567	0.836243	0.789846	0.0625368
90	8.051e-06	33.187	0.003	301.09		2	2.28928e+06	6.81846e+06	1.311e+07	0.896962	0.980258	0.59007				1	0.71452	0.812042	0.843174	0.789912	0.067121
120	8.051e-06	26.19	0.049	264.434		3	1.82698e+06	6.62967e+06	1.31529e+07	0.915455	0.984245	0.608661				1.5	0.856943	0.914004	0.940848	0.903931	0.0428498
180	8.051e-06	22.468	0.01	401.782		4	1.89231e+06	6.724e+06	1.37408e+07	0.91536	0.983682	0.614605				2	0.896962	0.932203	0.962816	0.93066	0.0329541
240	8.051e-06	22.994	0.002	298.583		5	2.08769e+06	8.58465e+06	1.79866e+07	0.927154	0.981997	0.627608				3	0.915455	0.938412	0.970571	0.941479	0.0276859
300	8.051e-06	24.567	0.02	298.917		10	2.10359e+06	8.70353e+06	1.82974e+07	0.927723	0.98186	0.628679				4	0.91536	0.93836	0.970434	0.941385	0.0276615
600	8.051e-06	24.695	0.027	382.67												5	0.927154	0.945525	0.977008	0.949896	0.0252127
																10	0.927723	0.943027	0.983909	0.951553	0.0290472
A2>P	Area	Mean	Min	Max
background	1.446e-05	8.838	2.328e-05	369.94
cntrl (600)	1.446e-05	34.267	0.025	463.987
10	1.446e-05	67.352	0.032	606.329												Fraction cA4 cut compared to no protein control
15	1.446e-05	69.198	0.03	530.889												Time (min)	R1	R2	R3	Average	SD
20	1.446e-05	72.295	2.328e-05	597.332
25	1.446e-05	95.563	0.011	851.97												cntrl (10)	0	0	0	0	0
30	1.446e-05	83.027	0.034	726.019												0.166667	0.394797	0.413068	0.411941	0.406602	0.0102393
35	1.446e-05	83.856	0.002	696.677												0.25	0.638067	0.625849	0.614543	0.626153	0.0117653
40	1.446e-05	109.658	0.002	855.071												0.333333	0.712904	0.726869	0.707394	0.715722	0.0100387
45	1.446e-05	90.061	0.005	734.364												0.416667	0.689884	0.725379	0.720378	0.71188	0.0192125
50	1.446e-05	89.559	0.002	634.694												0.5	0.810722	0.810962	0.812249	0.811311	0.000820941
55	1.446e-05	125.43	2.328e-05	1001.99												0.583333	0.859303	0.857321	0.866748	0.861124	0.00496997
60	1.446e-05	101.938	0.034	829.862												0.666667	0.845211	0.856371	0.855484	0.852355	0.00620328
90	1.446e-05	104.121	0.009	1069.7												0.75	0.908869	0.911798	0.910451	0.910373	0.00146631
120	1.446e-05	107.433	2.328e-05	944.198												0.833333	0.926632	0.943301	0.932974	0.934302	0.00841339
180	1.446e-05	104.703	0.032	1094.78												0.916667	0.920407	0.920218	0.92961	0.923412	0.00536887
240	1.446e-05	106.067	0.025	1177.38												1	0.938931	0.938775	0.949636	0.942447	0.00622637
300	1.446e-05	132.972	0.005	1193.33												1.5	0.972764	0.971533	0.981332	0.97521	0.00533804
600	1.446e-05	134.691	0.061	1105.66												2	0.980258	0.978498	0.988413	0.98239	0.00529009
																3	0.984245	0.9793	0.991125	0.98489	0.00593893
																4	0.983682	0.980017	0.990514	0.984737	0.00532756
A2-P	Area	Mean	Min	Max												5	0.981997	0.976349	0.99027	0.982872	0.00700165
background	2.142e-05	8.24	2.328e-05	369.94												10	0.98186	0.974742	0.992821	0.983141	0.0091071
cntrl (600)	2.142e-05	12.092	2.328e-05	228.84
10	2.142e-05	94.369	2.328e-05	969.573
15	2.142e-05	110.215	2.328e-05	859.592
20	2.142e-05	130.253	2.328e-05	974.688
25	2.142e-05	203.895	0.021	1446.17												Fraction cA4 and cleavage products converted to A2-P
30	2.142e-05	174.871	0.01	1192.33												Time (min)	R1	R2	R3	Average	SD
35	2.142e-05	189.485	0.018	1289.89
40	2.142e-05	276.5	0.011	1957.07												cntrl (10)	0.00152529	0.00199433	0.00140349	0.00164104	0.000311963
45	2.142e-05	225.969	0.025	1443.24												0.166667	0.0513873	0.11985	0.115242	0.0954929	0.038266
50	2.142e-05	228.188	0.02	1500.62												0.25	0.0935212	0.165231	0.17984	0.146197	0.0461998
55	2.142e-05	340.711	0.008	2007.77												0.333333	0.131319	0.259587	0.249525	0.213477	0.0713285
60	2.142e-05	249.991	0.034	1598.24												0.416667	0.178775	0.334694	0.350654	0.288041	0.0949631
90	2.142e-05	272.345	0.035	1817.89												0.5	0.223163	0.360122	0.388556	0.323947	0.0884317
120	2.142e-05	289.057	0.005	1848.47												0.583333	0.282379	0.448672	0.477529	0.40286	0.105332
180	2.142e-05	289.975	0.037	1875.12												0.666667	0.334451	0.511804	0.54336	0.463205	0.112615
240	2.142e-05	302.567	0.056	1826.55												0.75	0.385765	0.539292	0.580259	0.501772	0.102532
300	2.142e-05	393.512	0.061	2343.79												0.833333	0.421549	0.62014	0.621795	0.554495	0.115137
600	2.142e-05	400.171	0.128	2374.26												0.916667	0.47301	0.621218	0.678017	0.590748	0.105846
																1	0.454972	0.610033	0.680013	0.581673	0.11517
																1.5	0.558477	0.695464	0.766702	0.673548	0.105829
AfCsx3 technical replicate 2																2	0.59007	0.704648	0.780722	0.691813	0.095972
cA4	Area	Mean	Min	Max		Time (min)	Uncut cA4 (adjusted for background and area)	Cut A2>P (adjusted for background and area)	A2-P (adjusted for background and area)	Fraction cut (cut/(cut+uncut))	cA4 cut compared to control	Fraction of cA4 converted to A2-P				3	0.608661	0.714034	0.798139	0.706945	0.0949375
background	1.02e-05	8.895	2.328e-05	273.934		cntrl (10)	7.49985e+07	1.40959e+06	152688	0.0204057	0	0.00199433				4	0.614605	0.712168	0.795945	0.707573	0.0907577
cntrl (600)	1.02e-05	773.88	0.233	3436.11		0.166667	4.4019e+07	3.53616e+06	6.47557e+06	0.185297	0.413068	0.11985				5	0.627608	0.737988	0.806123
10	1.02e-05	457.889	0.387	2176.36		0.25	2.80608e+07	3.23134e+06	6.19383e+06	0.251432	0.625849	0.165231				10	0.628679	0.740127	0.824416	0.731074	0.0981819
15	1.02e-05	295.115	0.081	1445.07		0.333333	2.04844e+07	3.76995e+06	8.50351e+06	0.374672	0.726869	0.259587
20	1.02e-05	217.836	0.047	1241.82		0.416667	2.05962e+07	4.84508e+06	1.27987e+07	0.461396	0.725379	0.334694
25	1.02e-05	218.976	0.18	1215.44		0.5	1.41775e+07	4.08351e+06	1.02773e+07	0.50321	0.810962	0.360122
30	1.02e-05	153.506	0.061	984.353		0.583333	1.07007e+07	4.63219e+06	1.24779e+07	0.615233	0.857321	0.448672
35	1.02e-05	118.042	0.02	805.851		0.666667	1.0772e+07	5.53849e+06	1.70992e+07	0.677579	0.856371	0.511804
40	1.02e-05	118.769	0.029	663.459		0.75	6.615e+06	4.43384e+06	1.29335e+07	0.724172	0.911798	0.539292
45	1.02e-05	76.368	0.117	408.581		0.833333	4.25235e+06	4.50141e+06	1.4291e+07	0.815474	0.943301	0.62014
50	1.02e-05	52.269	0.03	344.947		0.916667	5.98353e+06	6.23897e+06	2.00454e+07	0.814567	0.920218	0.621218
55	1.02e-05	69.927	0.087	405.465		1	4.59176e+06	4.935e+06	1.49029e+07	0.812042	0.938775	0.610033
60	1.02e-05	55.731	0.039	375.156		1.5	2135000	5.4256e+06	1.7266e+07	0.914004	0.971533	0.695464
90	1.02e-05	30.672	2.328e-05	253.716		2	1.61265e+06	5.41271e+06	1.6761e+07	0.932203	0.978498	0.704648
120	1.02e-05	25.344	0.021	232.504		3	1.55245e+06	5.65589e+06	1.79987e+07	0.938412	0.9793	0.714034
180	1.02e-05	24.73	0.01	301.76		4	1.49873e+06	5.49969e+06	1.73158e+07	0.93836	0.980017	0.712168
240	1.02e-05	24.182	0.012	393.124		5	1.77382e+06	6.75791e+06	2.40307e+07	0.945525	0.976349	0.737988
300	1.02e-05	26.988	0.021	246.24		10	1.89431e+06	6.7463e+06	2.46087e+07	0.943027	0.974742	0.740127
600	1.02e-05	28.217	0.027	240.519
A2>P	Area	Mean	Min	Max
background	1.637e-05	9.807	2.328e-05	285.229
cntrl (600)	1.637e-05	32.882	2.328e-05	317.725
10	1.637e-05	67.694	0.011	482.248
15	1.637e-05	62.704	0.032	512.594
20	1.637e-05	71.521	0.056	685.262
25	1.637e-05	89.121	0.017	683.999
30	1.637e-05	76.654	0.01	720.309
35	1.637e-05	85.636	0.027	685.767
40	1.637e-05	100.472	0.001	819.055
45	1.637e-05	82.389	0.022	633.965
50	1.637e-05	83.495	0.027	661.969
55	1.637e-05	111.939	2.328e-05	823.203
60	1.637e-05	90.593	0.01	806.673
90	1.637e-05	98.624	0.03	865.261
120	1.637e-05	98.413	0.01	895.325
180	1.637e-05	102.394	0.004	1020.41
240	1.637e-05	99.837	0.005	911.86
300	1.637e-05	120.434	0.024	960.579
600	1.637e-05	120.244	0.027	1015.17
A2-P	Area	Mean	Min	Max
background	1.879e-05	9.398	2.328e-05	285.229
cntrl (600)	1.879e-05	12.267	2.328e-05	218.735
10	1.879e-05	131.074	0.024	924.728
15	1.879e-05	125.78	0.011	927.371
20	1.879e-05	169.179	0.01	1120.47
25	1.879e-05	249.885	0.022	1480.13
30	1.879e-05	202.508	0.0008382	1352.68
35	1.879e-05	243.858	0.087	1479.39
40	1.879e-05	330.692	0.015	1924.33
45	1.879e-05	252.418	0.041	1588.61
50	1.879e-05	277.925	0.03	1479.39
55	1.879e-05	386.051	0.081	2074.48
60	1.879e-05	289.424	0.015	1572.49
90	1.879e-05	333.827	0.054	1909.12
120	1.879e-05	324.338	0.017	1888.1
180	1.879e-05	347.593	0.03	1995.68
240	1.879e-05	334.762	2.328e-05	1953.66
300	1.879e-05	460.934	0.037	2419.61
600	1.879e-05	471.796	0.065	2425.32
AfCsx3 technical replicate 3
cA4	Area	Mean	Min	Max		Time (min)	Uncut cA4 (adjusted for background and area)	Cut A2>P (adjusted for background and area)	A2-P (adjusted for background and area)	Fraction cut (cut/(cut+uncut))	cA4 cut compared to control	Fraction of cA4 converted to A2-P
background	9.929e-06	8.727	2.328e-05	183.068		cntrl (10)	6.10788e+07	893887	87100.4	0.0158071	0	0.00140349
cntrl (600)	9.929e-06	615.178	1.017	2555.82		0.166667	3.59179e+07	2.182e+06	4.96259e+06	0.165912	0.411941	0.115242
10	9.929e-06	365.356	0.157	1639.4		0.25	2.35433e+07	2.22681e+06	5.6507e+06	0.25071	0.614543	0.17984
15	9.929e-06	242.488	0.051	1300.31		0.333333	1.7872e+07	2.32658e+06	6.71582e+06	0.335969	0.707394	0.249525
20	9.929e-06	186.178	0.092	1006.89		0.416667	1.7079e+07	3.08732e+06	1.089e+07	0.450065	0.720378	0.350654
25	9.929e-06	178.304	0.101	942.42		0.5	1.14676e+07	2.66012e+06	8.97779e+06	0.503685	0.812249	0.388556
30	9.929e-06	122.589	0.008	681.226		0.583333	8.13889e+06	2.85227e+06	1.00457e+07	0.613113	0.866748	0.477529
35	9.929e-06	89.538	0.047	601.585		0.666667	8.82687e+06	3.70017e+06	1.49061e+07	0.67824	0.855484	0.54336
40	9.929e-06	96.369	0.024	609.899		0.75	5.46953e+06	3.03679e+06	1.17593e+07	0.730108	0.910451	0.580259
45	9.929e-06	63.034	0.021	436.549		0.833333	4.09387e+06	3.08519e+06	1.18029e+07	0.784328	0.932974	0.621795
50	9.929e-06	49.375	2.328e-05	418.985		0.916667	4.29933e+06	4.15412e+06	1.78009e+07	0.836243	0.92961	0.678017
55	9.929e-06	51.415	0.01	381.161		1	3.07614e+06	3.20039e+06	1.33384e+07	0.843174	0.949636	0.680013
60	9.929e-06	39.27	0.0008382	331.46		1.5	1.1402e+06	3.35676e+06	1.47786e+07	0.940848	0.981332	0.766702
90	9.929e-06	20.048	2.328e-05	258.504		2	707725	3.46579e+06	1.48595e+07	0.962816	0.988413	0.780722
120	9.929e-06	15.754	2.328e-05	363.104		3	542049	3.17605e+06	1.4701e+07	0.970571	0.991125	0.798139
180	9.929e-06	14.109	0.001	297.917		4	579414	3.41952e+06	1.55984e+07	0.970434	0.990514	0.795945
240	9.929e-06	14.48	2.328e-05	226.365		5	594320	4.41716e+06	2.08373e+07	0.977008	0.99027	0.806123
300	9.929e-06	14.628	2.328e-05	208.997		10	438513	4.34655e+06	2.24672e+07	0.983909	0.992821	0.824416
600	9.929e-06	13.081	2.328e-05	235.161
A2>P	Area	Mean	Min	Max
background	1.783e-05	9.459	2.328e-05	183.068
cntrl (600)	1.783e-05	25.397	2.328e-05	303.607
10	1.783e-05	48.364	2.328e-05	462.948
15	1.783e-05	49.163	2.328e-05	553.812
20	1.783e-05	50.942	2.328e-05	545.892
25	1.783e-05	64.506	2.328e-05	701.781
30	1.783e-05	56.889	2.328e-05	654.294
35	1.783e-05	60.315	0.0003725	640.787
40	1.783e-05	75.433	0.0005821	818.226
45	1.783e-05	63.605	2.328e-05	724.979
50	1.783e-05	64.468	2.328e-05	730.707
55	1.783e-05	83.527	0.001	925.021
60	1.783e-05	66.522	2.328e-05	671.438
90	1.783e-05	69.31	2.328e-05	794.658
120	1.783e-05	71.254	2.328e-05	806.673
180	1.783e-05	66.088	2.328e-05	727.58
240	1.783e-05	70.429	2.328e-05	773.58
300	1.783e-05	88.217	2.328e-05	843.82
600	1.783e-05	86.958	2.328e-05	868.386
A2-P	Area	Mean	Min	Max
background	1.783e-05	9.307	2.328e-05	183.068
cntrl (600)	1.783e-05	10.86	2.328e-05	282.14
10	1.783e-05	97.79	2.328e-05	761.015
15	1.783e-05	110.059	0.018	872.087
20	1.783e-05	129.05	0.008	912.443
25	1.783e-05	203.476	2.328e-05	1309.03
30	1.783e-05	169.381	2.328e-05	1196
35	1.783e-05	188.422	0.002	1332.17
40	1.783e-05	275.082	0.016	1809.26
45	1.783e-05	218.976	2.328e-05	1470.49
50	1.783e-05	219.752	2.328e-05	1431.53
55	1.783e-05	326.697	0.0003725	2191.24
60	1.783e-05	247.131	2.328e-05	1543.92
90	1.783e-05	272.81	0.006	1600.94
120	1.783e-05	274.251	0.0005821	1796.56
180	1.783e-05	271.426	2.328e-05	1541.27
240	1.783e-05	287.427	0.003	1743.37
300	1.783e-05	380.836	2.328e-05	2107.58
600	1.783e-05	409.898	0.021	2234.37

## Sheet: AfCsx3 single-turnover 4-6
AfCsx3 technical replicate 4
cA4	Area	Mean	Min	Max		Time (min)	Uncut cA4 (adjusted for background and area)	Cut A2>P (adjusted for background and area)	A2-P (adjusted for background and area)	Fraction cut (cut/(cut+uncut))	cA4 cut compared to control	Fraction of cA4 converted to A2-P				Fraction cA4 cut (cut/(cut+uncut))
background	9.715e-06	16.194	0.003	360.351		cntrl (10)	9.04567e+07	2.28182e+06	201767	0.0267224	0	0.00217093				Time (min)	R4	R5	R6	Average	SD
cntrl (600)	9.715e-06	894.981	1.918	3270.7		0.166667	5.96915e+07	6.34185e+06	4.8879e+06	0.158341	0.34011	0.0689201
10	9.715e-06	596.097	1.538	2511.62		0.25	3.52097e+07	7.36827e+06	6.37407e+06	0.280731	0.610757	0.130211				cntrl (10)	0.0267224	0.0227395	0.0194296	0.0229638	0.00365154
15	9.715e-06	358.256	1.168	1653.89		0.333333	3.49573e+07	9.20635e+06	8.40923e+06	0.33507	0.613547	0.159954				0.166667	0.158341	0.139762	0.168963	0.155689	0.0147799
20	9.715e-06	355.804	0.589	1594.38		0.416667	3.05957e+07	1.03374e+07	1.08497e+07	0.409154	0.661764	0.209524				0.25	0.280731	0.263877	0.304893	0.283167	0.0206165
25	9.715e-06	313.431	0.754	1403.55		0.5	1.58231e+07	9.18654e+06	1.02118e+07	0.550754	0.825076	0.289932				0.333333	0.33507	0.35505	0.383332	0.357817	0.02425
30	9.715e-06	169.915	0.145	887.832		0.583333	1.52078e+07	1.03696e+07	1.18116e+07	0.593254	0.831877	0.315911				0.416667	0.409154	0.409863	0.493543	0.43752	0.0485189
35	9.715e-06	163.938	0.797	879.513		0.666667	1.41037e+07	1.17168e+07	1.43894e+07	0.649249	0.844084	0.357857				0.5	0.550754	0.502017	0.593123	0.548632	0.0455901
40	9.715e-06	153.211	0.252	757.293		0.75	7.99352e+06	1.02476e+07	1.20367e+07	0.735995	0.911632	0.397543				0.583333	0.593254	0.599481	0.65063	0.614455	0.0314831
45	9.715e-06	93.851	0.157	575.135		0.833333	7.95996e+06	1.17294e+07	1.3549e+07	0.760519	0.912003	0.407632				0.666667	0.649249	0.614863	0.701468	0.655193	0.0436075
50	9.715e-06	93.525	0.347	623.318		0.916667	7.6316e+06	1.38582e+07	1.73833e+07	0.803679	0.915633	0.44718				0.75	0.735995	0.694035	0.776624	0.735551	0.0412959
55	9.715e-06	90.335	0.176	632.265		1	4.85198e+06	1.17103e+07	1.33448e+07	0.837765	0.946361	0.446209				0.833333	0.760519	0.724812	0.812843	0.766058	0.0442761
60	9.715e-06	63.331	0.016	424.733		1.5	2.50952e+06	1.19929e+07	1.46187e+07	0.913825	0.972257	0.501997				0.916667	0.803679	0.782181	0.847175	0.811012	0.0331118
90	9.715e-06	40.574	0.03	303.775		2	1.81513e+06	1.22497e+07	1.50395e+07	0.937634	0.979934	0.516743				1	0.837765	0.806294	0.87761	0.840556	0.0357398
120	9.715e-06	33.828	0.009	270.907		3	1.33001e+06	1.23155e+07	1.49061e+07	0.953418	0.985297	0.522076				1.5	0.913825	0.904498	0.933571	0.917298	0.0148445
180	9.715e-06	29.115	0.061	287.024		4	1.37128e+06	1.28274e+07	1.61035e+07	0.954747	0.98484	0.53143				2	0.937634	0.916877	0.954693	0.936401	0.0189382
240	9.715e-06	29.516	0.056	282.951		5	1.30499e+06	1.56241e+07	2.04368e+07	0.965075	0.985573	0.546937				3	0.953418	0.919499	0.964564	0.945827	0.0234723
300	9.715e-06	28.872	0.045	275.854		10	1.27905e+06	1.4985e+07	2.01192e+07	0.964845	0.98586	0.552979				4	0.954747	0.923417	0.964809	0.947658	0.0215872
600	9.715e-06	28.62	0.029	284.903												5	0.965075	0.929704	0.964186	0.952988	0.0201699
																10	0.964845	0.927272	0.963817	0.951978	0.0214023
A2>P	Area	Mean	Min	Max
background	1.166e-05	16.378	0.015	385.507
cntrl (600)	1.166e-05	42.984	0.018	389.878
10	1.166e-05	90.324	0.068	550.184												Fraction cA4 cut compared to no protein control
15	1.166e-05	102.292	2.328e-05	598.984												Time (min)	R4	R5	R6	Average	SD
20	1.166e-05	123.724	0.047	818.226
25	1.166e-05	136.912	0.101	868.955												cntrl (10)	0	0	0	0	0
30	1.166e-05	123.493	0.101	816.295												0.166667	0.34011	0.386416	0.428325	0.38495	0.044126
35	1.166e-05	137.287	0.197	735.934												0.25	0.610757	0.662488	0.665439	0.646228	0.0307545
40	1.166e-05	152.996	0.084	883.524												0.333333	0.613547	0.72378	0.75562	0.697649	0.0745543
45	1.166e-05	135.865	0.084	885.246												0.416667	0.661764	0.702309	0.757364	0.707146	0.0479832
50	1.166e-05	153.143	0.047	1064.34												0.5	0.825076	0.825928	0.848072	0.833025	0.0130376
55	1.166e-05	177.965	0.045	1084.9												0.583333	0.831877	0.871224	0.888659	0.86392	0.0290869
60	1.166e-05	152.92	0.157	921.795												0.666667	0.844084	0.835308	0.878312	0.852568	0.0227229
90	1.166e-05	156.215	0.032	996.502												0.75	0.911632	0.908674	0.927849	0.916052	0.0103231
120	1.166e-05	159.21	0.105	1079.82												0.833333	0.912003	0.921084	0.946724	0.926604	0.0180067
180	1.166e-05	159.977	0.016	1205.7												0.916667	0.915633	0.922207	0.943851	0.92723	0.0147645
240	1.166e-05	165.946	0.032	1110.16												1	0.946361	0.948175	0.96466	0.953066	0.0100822
300	1.166e-05	198.555	0.111	1482.36												1.5	0.972257	0.976999	0.980245	0.9765	0.00401724
600	1.166e-05	191.103	0.041	1247.95												2	0.979934	0.978709	0.986281	0.981641	0.00406427
																3	0.985297	0.978324	0.988991	0.984204	0.00541693
																4	0.98484	0.978322	0.988669	0.983944	0.00523172
A2-P	Area	Mean	Min	Max												5	0.985573	0.97452	0.986265	0.982119	0.00659017
background	2.264e-05	16.397	2.328e-05	385.507												10	0.98586	0.973961	0.985823	0.981881	0.00685924
cntrl (600)	2.264e-05	20.965	0.013	399.464
10	2.264e-05	127.059	0.063	854.507
15	2.264e-05	160.706	0.058	1053.35
20	2.264e-05	206.782	0.068	1323.03
25	2.264e-05	262.035	0.128	1761.96												Fraction cA4 and cleavage products converted to A2-P
30	2.264e-05	247.592	0.032	1561.04												Time (min)	R4	R5	R6	Average	SD
35	2.264e-05	283.811	0.054	1557.61
40	2.264e-05	342.172	0.114	1909.97												cntrl (10)	0.00217093	0.00133641	0.00171892	0.00174209	0.000417741
45	2.264e-05	288.909	0.054	1796.56												0.166667	0.0689201	0.0668331	0.106366	0.0807062	0.0222461
50	2.264e-05	323.147	0.043	2016.86												0.25	0.130211	0.138101	0.208217	0.158843	0.0429407
55	2.264e-05	409.954	2.328e-05	2495.68												0.333333	0.159954	0.196686	0.26429	0.206977	0.052924
60	2.264e-05	318.523	0.029	2073.16												0.416667	0.209524	0.230677	0.360962	0.267054	0.0820113
90	2.264e-05	347.365	0.061	2311.66												0.5	0.289932	0.280451	0.435346	0.335243	0.0868211
120	2.264e-05	356.891	0.017	2302.86												0.583333	0.315911	0.343171	0.475169	0.378084	0.0851761
180	2.264e-05	353.872	0.056	2101.82												0.666667	0.357857	0.369956	0.523881	0.417231	0.0925592
240	2.264e-05	380.981	0.092	2352.21												0.75	0.397543	0.402733	0.583658	0.461311	0.105987
300	2.264e-05	479.086	0.056	2761.8												0.833333	0.407632	0.428313	0.61125	0.482398	0.112067
600	2.264e-05	471.895	0.081	3000.03												0.916667	0.44718	0.484875	0.64647	0.526175	0.10587
																1	0.446209	0.493221	0.659889	0.533106	0.112285
																1.5	0.501997	0.549047	0.704219	0.585088	0.105819
AfCsx3 technical replicate 5																2	0.516743	0.560776	0.723494	0.600338	0.108905
cA4	Area	Mean	Min	Max		Time (min)	Uncut cA4 (adjusted for background and area)	Cut A2>P (adjusted for background and area)	A2-P (adjusted for background and area)	Fraction cut (cut/(cut+uncut))	cA4 cut compared to control	Fraction of cA4 converted to A2-P				3	0.522076	0.566926	0.737538	0.608847	0.113684
background	9.559e-06	17.699	0.012	336.929		cntrl (10)	9.95153e+07	2.1795e+06	136088	0.0227395	0	0.00133641				4	0.53143	0.572581	0.738481	0.614164	0.10961
cntrl (600)	9.559e-06	968.966	2.49	3420.28		0.166667	6.1061e+07	5.17661e+06	4.74391e+06	0.139762	0.386416	0.0668331				5	0.546937	0.586796	0.743665
10	9.559e-06	601.381	0.657	2536.83		0.25	3.35876e+07	5.73886e+06	6.30123e+06	0.263877	0.662488	0.138101				10	0.552979	0.594153	0.751464	0.632865	0.104752
15	9.559e-06	338.763	0.483	1544.68		0.333333	2.74881e+07	6.74959e+06	8.38286e+06	0.35505	0.72378	0.196686
20	9.559e-06	280.458	0.252	1348.78		0.416667	2.96249e+07	8.99511e+06	11580000	0.409863	0.702309	0.230677
25	9.559e-06	300.883	0.347	1314.27		0.5	1.73228e+07	7.7074e+06	9.75578e+06	0.502017	0.825928	0.280451
30	9.559e-06	183.288	0.308	958.187		0.583333	1.28151e+07	8.20096e+06	1.09802e+07	0.599481	0.871224	0.343171
35	9.559e-06	140.199	0.084	740.129		0.666667	1.63894e+07	1.04219e+07	1.57433e+07	0.614863	0.835308	0.369956
40	9.559e-06	174.365	0.09	909.821		0.75	9.08829e+06	8.65278e+06	1.19627e+07	0.694035	0.908674	0.402733
45	9.559e-06	104.574	0.176	577.916		0.833333	7.85333e+06	8.46151e+06	1.22232e+07	0.724812	0.921084	0.428313
50	9.559e-06	92.769	0.011	470.663		0.916667	7.7416e+06	1.05667e+07	1.72332e+07	0.782181	0.922207	0.484875
55	9.559e-06	91.701	0.037	498.274		1	5.15734e+06	8.33546e+06	1.31318e+07	0.806294	0.948175	0.493221
60	9.559e-06	66.998	0.108	418.985		1.5	2.28894e+06	8.51932e+06	1.31593e+07	0.904498	0.976999	0.549047
90	9.559e-06	39.579	0.017	313.609		2	2.11874e+06	9.07668e+06	1.42937e+07	0.916877	0.978709	0.560776
120	9.559e-06	37.952	0.034	298.583		3	2.15713e+06	9.44759e+06	1.51914e+07	0.919499	0.978324	0.566926
180	9.559e-06	38.319	0.027	300.588		4	2.15734e+06	9.88305e+06	1.61296e+07	0.923417	0.978322	0.572581
240	9.559e-06	38.321	0.124	401.588		5	2.53562e+06	1.23688e+07	2.1166e+07	0.929704	0.97452	0.586796
300	9.559e-06	41.937	0.105	366.792		10	2.59128e+06	1.18688e+07	2.11694e+07	0.927272	0.973961	0.594153
600	9.559e-06	42.469	0.039	356.514
A2>P	Area	Mean	Min	Max
background	1.351e-05	16.969	0.006	336.929
cntrl (600)	1.351e-05	46.414	0.07	361.084
10	1.351e-05	86.905	0.07	629.114
15	1.351e-05	94.501	0.145	712.818
20	1.351e-05	108.156	0.058	704.596
25	1.351e-05	138.493	0.121	1045.22
30	1.351e-05	121.096	0.145	937.685
35	1.351e-05	127.764	0.068	866.965
40	1.351e-05	157.769	0.047	1159.24
45	1.351e-05	133.868	0.098	946.572
50	1.351e-05	131.284	0.114	879.799
55	1.351e-05	159.725	0.16	1010.57
60	1.351e-05	129.581	0.058	858.744
90	1.351e-05	132.065	0.039	957.889
120	1.351e-05	139.595	0.065	1035.88
180	1.351e-05	144.606	0.063	1053.35
240	1.351e-05	150.489	0.142	1089.67
300	1.351e-05	184.072	2.328e-05	1325.49
600	1.351e-05	177.317	0.063	1247.61
A2-P	Area	Mean	Min	Max
background	2.275e-05	16.75	2.328e-05	336.929
cntrl (600)	2.275e-05	19.846	2.328e-05	336.575
10	2.275e-05	124.674	0.027	951.924
15	2.275e-05	160.103	0.051	1131.81
20	2.275e-05	207.46	0.047	1414.06
25	2.275e-05	280.195	0.043	1810.49
30	2.275e-05	238.694	0.022	1681.47
35	2.275e-05	266.55	0.015	1590.92
40	2.275e-05	374.911	0.034	2142.72
45	2.275e-05	288.901	0.049	1755.48
50	2.275e-05	294.828	0.024	1753.46
55	2.275e-05	408.805	0.098	2362.52
60	2.275e-05	315.499	0.043	1951.95
90	2.275e-05	316.125	0.045	2025.54
120	2.275e-05	341.931	0.068	2041.64
180	2.275e-05	362.355	0.056	2301
240	2.275e-05	383.699	0.081	2482.2
300	2.275e-05	498.277	0.029	2844.06
600	2.275e-05	498.353	0.206	2982.61
AfCsx3 technical replicate 6
cA4	Area	Mean	Min	Max		Time (min)	Uncut cA4 (adjusted for background and area)	Cut A2>P (adjusted for background and area)	A2-P (adjusted for background and area)	Fraction cut (cut/(cut+uncut))	cA4 cut compared to control	Fraction of cA4 converted to A2-P
background	1.067e-05	33.144	0.051	374.595		cntrl (10)	1.41272e+08	2.55161e+06	247648	0.0194296	0	0.00171892
cntrl (600)	1.067e-05	1540.52	7.069	5983.07		0.166667	8.07619e+07	6.0833e+06	1.03368e+07	0.168963	0.428325	0.106366
10	1.067e-05	894.873	2.739	3987.23		0.25	4.72642e+07	6.57358e+06	1.41578e+07	0.304893	0.665439	0.208217
15	1.067e-05	537.453	0.517	2429.59		0.333333	3.45241e+07	6.66456e+06	1.47963e+07	0.383332	0.75562	0.26429
20	1.067e-05	401.516	0.746	2042.95		0.416667	3.42777e+07	8.97329e+06	2.44304e+07	0.493543	0.757364	0.360962
25	1.067e-05	398.887	0.319	1831.09		0.5	2.14633e+07	8.32296e+06	2.2965e+07	0.593123	0.848072	0.435346
30	1.067e-05	262.157	0.456	1336.75		0.583333	1.57294e+07	7.89965e+06	2.13932e+07	0.65063	0.888659	0.475169
35	1.067e-05	200.977	0.611	1159.57		0.666667	1.71911e+07	1.02264e+07	3.01679e+07	0.701468	0.878312	0.523881
40	1.067e-05	216.573	0.292	1113.7		0.75	1.0193e+07	8.80527e+06	2.66331e+07	0.776624	0.927849	0.583658
45	1.067e-05	141.903	0.545	687.031		0.833333	7.52643e+06	8.10697e+06	2.45811e+07	0.812843	0.946724	0.61125
50	1.067e-05	113.451	0.319	595.918		0.916667	7.93233e+06	1.04176e+07	3.35549e+07	0.847175	0.943851	0.64647
55	1.067e-05	117.782	0.101	644.457		1	4.9925e+06	8.88125e+06	2.6918e+07	0.87761	0.96466	0.659889
60	1.067e-05	86.414	0.18	473.178		1.5	2.79082e+06	9.63562e+06	2.95858e+07	0.933571	0.980245	0.704219
90	1.067e-05	62.922	0.098	466.693		2	1.93814e+06	9.89022e+06	3.09496e+07	0.954693	0.986281	0.723494
120	1.067e-05	53.824	0.098	298.417		3	1.5553e+06	9.96432e+06	3.23711e+07	0.964564	0.988991	0.737538
180	1.067e-05	49.739	0.065	360.351		4	1.60075e+06	1.0295e+07	3.35915e+07	0.964809	0.988669	0.738481
240	1.067e-05	50.224	0.114	333.571		5	1.94039e+06	1.19477e+07	4.02913e+07	0.964186	0.986265	0.743665
300	1.067e-05	53.848	0.33	400.429		10	2.00281e+06	1.17541e+07	4.15947e+07	0.963817	0.985823	0.751464
600	1.067e-05	54.514	0.111	401.395
A2>P	Area	Mean	Min	Max
background	1.707e-05	33.516	0.051	431.322
cntrl (600)	1.707e-05	77.072	0.073	504.107
10	1.707e-05	137.358	0.347	867.533
15	1.707e-05	145.727	0.319	954.606
20	1.707e-05	147.28	0.364	921.795
25	1.707e-05	186.69	0.738	1197
30	1.707e-05	175.589	0.252	1173.08
35	1.707e-05	168.363	0.303	1272.96
40	1.707e-05	208.081	0.443	1297.88
45	1.707e-05	183.822	0.105	1411.52
50	1.707e-05	171.902	0.381	1368.7
55	1.707e-05	211.344	0.16	1548.1
60	1.707e-05	185.119	0.121	1401.38
90	1.707e-05	197.996	0.197	1631.59
120	1.707e-05	202.342	0.076	1531.06
180	1.707e-05	203.607	0.238	1584.38
240	1.707e-05	209.252	0.138	1569.82
300	1.707e-05	237.463	0.242	1797.38
600	1.707e-05	234.158	0.224	1594.77
A2-P	Area	Mean	Min	Max
background	1.956e-05	32.958	0.051	431.322
cntrl (600)	1.956e-05	37.802	0.142	318.585
10	1.956e-05	235.146	0.238	1299.96
15	1.956e-05	309.885	0.128	1716.08
20	1.956e-05	322.373	0.09	1761.55
25	1.956e-05	510.817	0.381	2726.92
30	1.956e-05	482.154	0.319	2871.92
35	1.956e-05	451.409	0.095	2625.08
40	1.956e-05	623.042	0.121	3159.62
45	1.956e-05	553.902	0.224	2728.93
50	1.956e-05	513.764	0.358	2958.41
55	1.956e-05	689.292	0.376	3456.5
60	1.956e-05	559.475	0.228	2903.03
90	1.956e-05	611.657	0.358	3069.67
120	1.956e-05	638.333	0.215	3431.02
180	1.956e-05	666.136	0.308	3653.85
240	1.956e-05	690.007	0.324	3467.86
300	1.956e-05	821.055	0.297	4045.94
600	1.956e-05	846.55	0.4	4356.15

## Sheet: Average 1-6 single-turnover
Fraction cA4 cut compared to no protein control
Time (min)	Replicate 1	Replicate 2	Replicate 3	Replicate 4	Replicate 5	Replicate 6	Average	SD
cntrl (10)	0	0	0	0	0	0	0	0
0.166667	0.394797	0.413068	0.411941	0.34011	0.386416	0.428325	0.395776	0.0310067
0.25	0.638067	0.625849	0.614543	0.610757	0.662488	0.665439	0.63619	0.0235501
0.333333	0.712904	0.726869	0.707394	0.613547	0.72378	0.75562	0.706686	0.0485967
0.416667	0.689884	0.725379	0.720378	0.661764	0.702309	0.757364	0.709513	0.0327922
0.5	0.810722	0.810962	0.812249	0.825076	0.825928	0.848072	0.822168	0.0144815
0.583333	0.859303	0.857321	0.866748	0.831877	0.871224	0.888659	0.862522	0.0187255
0.666667	0.845211	0.856371	0.855484	0.844084	0.835308	0.878312	0.852462	0.0148976
0.75	0.908869	0.911798	0.910451	0.911632	0.908674	0.927849	0.913212	0.00729119
0.833333	0.926632	0.943301	0.932974	0.912003	0.921084	0.946724	0.930453	0.0132587
0.916667	0.920407	0.920218	0.92961	0.915633	0.922207	0.943851	0.925321	0.0101538
1	0.938931	0.938775	0.949636	0.946361	0.948175	0.96466	0.947757	0.0094864
1.5	0.972764	0.971533	0.981332	0.972257	0.976999	0.980245	0.975855	0.00428405
2	0.980258	0.978498	0.988413	0.979934	0.978709	0.986281	0.982015	0.00423902
3	0.984245	0.9793	0.991125	0.985297	0.978324	0.988991	0.984547	0.00509774
4	0.983682	0.980017	0.990514	0.98484	0.978322	0.988669	0.98434	0.00474241
5	0.981997	0.976349	0.99027	0.985573	0.97452	0.986265	0.982496	0.00609517
10	0.98186	0.974742	0.992821	0.98586	0.973961	0.985823	0.982511	0.0072437
