# Supplementary material for: Tetramerisation of the CRISPR ring nuclease Crn3/Csx3 facilitates cyclic oligoadenylate cleavage
Source: eLife. 2020 Jun 29;9:e57627. doi: 10.7554/eLife.57627 (PMC7371418; doi:10.7554/eLife.57627)
Supplement: Figure 2—source data 2. [file elife-57627-fig2-data2.xlsx]

## Sheet: AfCsx3 RNA 49-9A cleavage
Technical replicate 1	Area	Mean	Min	Max			Technical replicate 1														Average of replicates
Uncut RNA							Time (min)	Uncut (area and background adjusted)	Cut (area and background adjusted)	Fraction cut	Starting substrate actual	Fraction cut compared to 90 min set as 100% cut									Time (min)	Replicate 1	Replicate 2	Replicate 3	Average	SD
Background	8.368e-06	0.315	2.328e-05	63.775			Control (90)	8.97661e+07	1.55518e+06	0.0170298	9.13213e+07	0.0346667									5	0.106462	0.112869	0.0948859	0.104739	0.00911467
Control (90)	8.368e-06	751.478	1.526	2376.14			5	9.4813e+07	5.23223e+06	0.0522987	1.00045e+08	0.106462									10	0.158503	0.166602	0.153198	0.159434	0.00675026
5	8.368e-06	793.71	2.836	2357.36			10	7.01107e+07	5.92001e+06	0.0778634	7.60307e+07	0.158503									15	0.202521	0.235169	0.195305	0.210998	0.021241
10	8.368e-06	587.001	1.398	2027.71			15	5.63609e+07	6.22666e+06	0.0994872	6.25876e+07	0.202521									20	0.26548	0.309069	0.247906	0.274152	0.03149
15	8.368e-06	471.943	0.95	1575.94			20	5.17422e+07	7.76002e+06	0.130416	5.95023e+07	0.26548									25	0.31922	0.351604	0.296677	0.3225	0.02761
20	8.368e-06	433.294	1.2	1604.42			25	4.48524e+07	8.34162e+06	0.156815	5.3194e+07	0.31922									30	0.369547	0.407146	0.348594	0.375096	0.029668
25	8.368e-06	375.64	0.282	1324.08			30	3.88694e+07	8.62135e+06	0.181538	4.74907e+07	0.369547									35	0.433914	0.485972	0.420677	0.446854	0.0345173
30	8.368e-06	325.574	0.081	1349.13			35	3.65773e+07	9.90888e+06	0.213157	4.64862e+07	0.433914									40	0.513322	0.547061	0.47417	0.511518	0.0364792
35	8.368e-06	306.394	0.017	1204.69			40	3.03787e+07	1.02436e+07	0.252167	4.06223e+07	0.513322									50	0.645759	0.693212	0.607545	0.648839	0.0429163
40	8.368e-06	254.524	0.252	1002.91			50	2.42059e+07	1.12463e+07	0.317225	3.54522e+07	0.645759									60	0.705962	0.766304	0.727424	0.73323	0.0305872
50	8.368e-06	202.87	0.189	838.782			60	2.22189e+07	1.17965e+07	0.346799	3.40155e+07	0.705962									90	1	1	1	1	0
60	8.368e-06	186.243	0.02	848.874			90	1.20452e+07	1.16306e+07	0.491244	2.36757e+07	1
90	8.368e-06	101.109	0.018	532.002			D69A (90)	5.06315e+07	644016	0.0125599	5.12755e+07	0.0255676
D69A Csx3 variant (90)	8.368e-06	423.999	0.649	1445.44
Cut RNA
Background	2.749e-05	0.688	2.328e-05	76.787
Control (90)	2.749e-05	43.44	2.328e-05	734.102
5	2.749e-05	144.522	2.328e-05	1172.75
10	2.749e-05	163.429	2.328e-05	1348.42
15	2.749e-05	171.859	2.328e-05	1122.41
20	2.749e-05	214.011	2.328e-05	1384.1
25	2.749e-05	229.999	2.328e-05	1380.15
30	2.749e-05	237.689	2.328e-05	1261.28
35	2.749e-05	273.083	2.328e-05	1389.13
40	2.749e-05	282.284	0.002	1363.7
50	2.749e-05	309.85	2.328e-05	1326.19
60	2.749e-05	324.975	2.328e-05	1252.73
90	2.749e-05	320.412	0.025	1601.33
D69A Csx3 variant (90)	2.749e-05	18.392	2.328e-05	415.83
Technical replicate 2	Area	Mean	Min	Max			Technical replicate 2
Uncut RNA							Time (min)	Uncut (area and background adjusted)	Cut (area and background adjusted)	Fraction cut	Starting substrate actual	Fraction cut compared to 90 min set as 100% cut
Background	9.715e-06	2.916	2.328e-05	148.332			Control (90)	6.52152e+07	611693	0.00929245	6.58269e+07	0.0192764
Control (90)	9.715e-06	636.482	19.028	2224.34			5	8.26114e+07	4.75355e+06	0.0544103	8.7365e+07	0.112869
5	9.715e-06	805.486	1.066	3035.02			10	6.14953e+07	5.37016e+06	0.0803129	6.68655e+07	0.166602
10	9.715e-06	600.343	0.626	2400.19			15	5.65885e+07	7.23551e+06	0.113367	6.3824e+07	0.235169
15	9.715e-06	552.673	0.552	1951.1			20	5.48043e+07	9.59492e+06	0.148991	6.43992e+07	0.309069
20	9.715e-06	535.34	0.039	1917.14			25	4.54765e+07	9.2812e+06	0.169496	5.47577e+07	0.351604
25	9.715e-06	444.72	0.262	1653.89			30	4.06643e+07	9.93023e+06	0.196271	5.05946e+07	0.407146
30	9.715e-06	397.97	0.172	1683.85			35	3.54751e+07	1.08534e+07	0.23427	4.63285e+07	0.485972
35	9.715e-06	347.557	0.011	1404.27			40	3.11623e+07	1.11616e+07	0.263719	4.23239e+07	0.547061
40	9.715e-06	305.658	0.164	1310.77			50	2.46546e+07	1.23739e+07	0.334173	3.70284e+07	0.693212
50	9.715e-06	242.435	0.201	983.748			60	2.20303e+07	1.29056e+07	0.369408	3.49358e+07	0.766304
60	9.715e-06	216.94	0.045	995.284			90	1.46056e+07	1.3594e+07	0.482064	2.81996e+07	1
90	9.715e-06	144.809	2.328e-05	712.045			D69A (90)	6.96709e+07	1.06174e+06	0.0150106	7.07327e+07	0.0311382
D69A Csx3 variant (90)	9.715e-06	679.769	1.253	2186.72
Cut RNA
Background	3.053e-05	3.326	2.328e-05	148.332
Control (90)	3.053e-05	22.001	2.328e-05	622.596
5	3.053e-05	148.452	2.328e-05	1590.53
10	3.053e-05	167.277	2.328e-05	1300.31
15	3.053e-05	224.226	2.328e-05	1616.42
20	3.053e-05	296.259	2.328e-05	1999.56
25	3.053e-05	286.681	2.328e-05	1735.73
30	3.053e-05	306.496	2.328e-05	1711.69
35	3.053e-05	334.679	2.328e-05	1825.31							148.332
40	3.053e-05	344.09	0.0002096	1751.85							622.596
50	3.053e-05	381.101	2.328e-05	1757.51							1590.53
60	3.053e-05	397.333	0.001	1711.69							1300.31
90	3.053e-05	418.351	2.328e-05	2013.4							1616.42
D69A Csx3 variant (90)	3.053e-05	35.741	2.328e-05	523.797							1999.56
											1735.73
											1711.69
Technical replicate 3	Area	Mean	Min	Max			Technical replicate 3
Uncut RNA							Time (min)	Uncut (area and background adjusted)	Cut (area and background adjusted)	Fraction cut	Starting substrate actual	Fraction cut compared to 90 min set as 100% cut
Background	6.87e-06	0.335	2.328e-05	70.657			Control (90)	7.61444e+07	699553	0.00910356	7.68439e+07	0.0213126
Control (90)	6.87e-06	523.447	1.421	1921.79			5	1.29948e+08	5.48928e+06	0.0405299	1.35438e+08	0.0948859
5	6.87e-06	893.081	5.253	2595.5			10	1.02551e+08	7.18057e+06	0.0654377	1.09731e+08	0.153198
10	6.87e-06	704.859	1.905	2227.99			15	8.71655e+07	7.93347e+06	0.0834233	9.5099e+07	0.195305
15	6.87e-06	599.162	0.18	2018.16			20	7.17051e+07	8.49222e+06	0.105892	8.01973e+07	0.247906
20	6.87e-06	492.949	1.398	1798.61			25	6.6087e+07	9.5901e+06	0.126724	7.56771e+07	0.296677
25	6.87e-06	454.353	1.308	1604.03			30	5.74926e+07	1.00583e+07	0.1489	6.75509e+07	0.348594
30	6.87e-06	395.309	0.335	1350.91			35	5.49524e+07	1.20373e+07	0.179689	6.69897e+07	0.420677
35	6.87e-06	377.858	0.634	1224.88			40	4.80658e+07	1.22077e+07	0.202539	6.02735e+07	0.47417
40	6.87e-06	330.547	0.51	1185.68			50	3.93083e+07	1.37758e+07	0.259509	5.30841e+07	0.607545
50	6.87e-06	270.383	3.615	884.672			60	3.24755e+07	1.46392e+07	0.310714	4.71148e+07	0.727424
60	6.87e-06	223.442	0.885	935.618			90	1.96099e+07	1.46219e+07	0.427144	3.42318e+07	1
90	6.87e-06	135.055	0.531	646.418			D69A (90)	1.02832e+08	1.11485e+06	0.0107253	1.03947e+08	0.0251092
D69A Csx3 variant (90)	6.87e-06	706.79	58.053	2068.77
Cut RNA
Background	2.686e-05	0.624	2.328e-05	87.632
Control (90)	2.686e-05	19.414	2.328e-05	483.945
5	2.686e-05	148.066	2.328e-05	1341.7
10	2.686e-05	193.494	2.328e-05	1349.49
15	2.686e-05	213.717	2.328e-05	1430.8
20	2.686e-05	228.725	2.328e-05	1354.45
25	2.686e-05	258.214	2.328e-05	1549.62
30	2.686e-05	270.79	2.328e-05	1451.31
35	2.686e-05	323.947	2.328e-05	1937.9
40	2.686e-05	328.523	0.0003725	1579.01
50	2.686e-05	370.642	2.328e-05	1516.74
60	2.686e-05	393.834	0.005	1486.45
90	2.686e-05	393.368	0.108	1722.88
D69A Csx3 variant (90)	2.686e-05	30.569	2.328e-05	730.707
