# Supplementary material for: Tetramerisation of the CRISPR ring nuclease Crn3/Csx3 facilitates cyclic oligoadenylate cleavage
Source: eLife. 2020 Jun 29;9:e57627. doi: 10.7554/eLife.57627 (PMC7371418; doi:10.7554/eLife.57627)
Supplement: Figure 6—source data 1. [file elife-57627-fig6-data1.xlsx]

## Sheet: All data
[AfCsx3 dimer]			Area	Mean	Min	Max		[AfCsx3 dimer] nM	Replicate	Time (min)	Uncut adjusted for background	Cut compared to cntrl	Adjusted for cold to hot cA4 (128 uM cold: 0.5 uM hot)		[AfCsx3 dimer]	Replicate	Initial rate (cA4 per min)	Average initial rate (cA4 per min )	SD
		Background	1.034e-05	4.225	2.328e-05	186.347		240 nM	1	Cntrl (120)	717.889	0	0		240	1	0.4029	0.366133	0.0657711
	Replicate 1	Cntrl (120 min)	1.034e-05	722.114	0.252	3382.57				30	870.78	-0.212973	-54.5211			2	0.4053															AfCsx3 (nM dimer)	V (nmole/min)	SD	nmole.min/nmole enzyme	SD
240 nM		30 min	1.034e-05	875.005	0.393	4108.18				60	734.371	-0.022959	-5.8775			3	0.2902															240	0.366133	0.0657711	0.00152556	0.000274046
		60 min	1.034e-05	738.596	0.634	3451.4				90	648.112	0.0971975	24.8826																			320	0.505233	0.0347261	0.00157885	0.000108519
		90 min	1.034e-05	652.337	0.721	3192.79				120	666.579	0.0714734	18.2972		320	1	0.5012	0.505233	0.0347261													640	20.1753	3.60125	0.031524	0.00562696
		120 min	1.034e-05	670.804	0.754	3366.32			2	Cntrl (120)	796.65	0	0			2	0.4727															800	46.4383	4.51739	0.0580479	0.00564674
	Replicate 2	Cntrl (120 min)	1.034e-05	800.875	0.313	3595.17				30	806.817	-0.0127622	-3.26712			3	0.5418															960	62.518	4.7585	0.0651229	0.00495677
240 nM		30 min	1.034e-05	811.042	0.03	3596.33				60	717.334	0.0995619	25.4879																			1120	83.8407	5.34443	0.0748577	0.00477182
		60 min	1.034e-05	721.559	0.574	3176.45				90	670.553	0.158284	40.5207		640	1	19.175	20.1753	3.60125													1280	95.1053	3.86222	0.074301	0.00301736
		90 min	1.034e-05	674.778	0.713	2731.96				120	641.655	0.194558	49.807			2	24.171															1920	141.707	7.02211	0.0738056	0.00365735
		120 min	1.034e-05	645.88	0.611	2426.74			3	Cntrl (120)	805.588	0	0			3	17.18															2560	190.757	21.9693	0.0745143	0.00858176
	Replicate 3	Cntrl (120 min)	1.034e-05	809.813	0.626	3855.49				30	846.955	-0.0513501	-13.1456																			3840	261.247	10.314	0.068033	0.00268595
240 nM		30 min	1.034e-05	851.18	0.589	4183.37				60	722.834	0.102725	26.2976		800	1	50.651	46.4383	4.51739													5120	297.243	10.8612	0.0580553	0.00212134
		60 min	1.034e-05	727.059	0.574	3409.57				90	700.254	0.130754	33.4731			2	41.668
		90 min	1.034e-05	704.479	0.387	3407.88				120	668.042	0.17074	43.7094			3	46.996
		120 min	1.034e-05	672.267	0.443	3348.42
								320	1	Cntrl (120)	824.252	0	0		960	1	57.434	62.518	4.7585
		Background	1e-05	4.268	2.328e-05	141.02				30	767.869	0.0684051	17.5117			2	66.865
	Replicate 1	Cntrl (120 min)	1e-05	828.52	1.647	3595.17				60	728.247	0.116475	29.8177			3	63.255
360 nM		30 min	1e-05	772.137	0.503	3636.38				90	669.103	0.18823	48.1869
		60 min	1e-05	732.515	0.4	3479.8				120	626.205	0.240275	61.5104		1120	1	87.665	83.8407	5.34443
		90 min	1e-05	673.371	0.4	3070.21			2	Cntrl (120)	873.578	0	0			2	77.734
		120 min	1e-05	630.473	0.746	2735.49				30	784.43	0.102049	26.1246			3	86.123
	Replicate 2	Cntrl (120 min)	1e-05	877.846	1.096	3765.53				60	683.855	0.217179	55.5979
360 nM		30 min	1e-05	788.698	1.21	3074.49				90	704.571	0.193465	49.5271		1280	1	92.503	95.1053	3.86222
		60 min	1e-05	688.123	0.443	2906.16				120	616.23	0.294591	75.4152			2	93.27
		90 min	1e-05	708.839	0.713	3160.16			3	Cntrl (120)	821.922	0	0			3	99.543
		120 min	1e-05	620.498	0.78	2855.39				30	859.395	-0.0455919	-11.6715
	Replicate 3	Cntrl (120 min)	1e-05	826.19	1.2	4104.47				60	748.923	0.088815	22.7366		1920	1	135.17	141.707	7.02211
360 nM		30 min	1e-05	863.663	0.134	4265.54				90	726.311	0.116326	29.7795			2	140.82
		60 min	1e-05	753.191	0.18	3596.91				120	692.965	0.156897	40.1656			3	149.13
		90 min	1e-05	730.579	0.456	3365.2
		120 min	1e-05	697.233	0.443	3328.91		640	1	Cntrl (4)	706.429	0	0		2560	1	215.73	190.757	21.9693
										1	721.915	-0.0219215	-5.61191			2	174.41
		Background	1.168e-05	8.091	2.328e-05	269.321				2	643.373	0.0892602	22.8506			3	182.13
	Replicate 1	Cntrl (4 min)	1.168e-05	714.52	0.193	3602.12				3	606.214	0.141861	36.3165
640 nM		1 min	1.168e-05	730.006	0.233	3804.12				4	557.92	0.210225	53.8176		3840	1	271.39	261.247	10.314
		2 min	1.168e-05	651.464	0.272	3369.12			2	Cntrl (4)	774.515	0	0			2	250.77
		3 min	1.168e-05	614.305	0.018	3496.33				1	725.244	0.0636153	16.2855			3	261.58
		4 min	1.168e-05	566.011	0.015	3084.66				2	672.638	0.131537	33.6733
	Replicate 2	Cntrl (4 min)	1.168e-05	782.606	0.228	4359.33				3	567.032	0.267888	68.5792		5120	1	285.1	297.243	10.8612
640 nM		1 min	1.168e-05	733.335	0.134	3975.05				4	516.682	0.332896	85.2214			2	300.6
		2 min	1.168e-05	680.729	0.134	3812.46			3	Cntrl (4)	734.309	0	0			3	306.03
		3 min	1.168e-05	575.123	0.303	3033.95				1	751.814	-0.0238387	-6.10272
		4 min	1.168e-05	524.773	0.247	2461.57				2	712.661	0.0294808	7.54708
	Replicate 3	Cntrl (4 min)	1.168e-05	742.4	0.567	3644.53				3	668.739	0.0892948	22.8595
640 nM		1 min	1.168e-05	759.905	0.138	4084.09				4	602.189	0.179924	46.0606
		2 min	1.168e-05	720.752	0.098	3867.48
		3 min	1.168e-05	676.83	0.128	3641.03		800	1	Cntrl (2)	806.18	0	0
		4 min	1.168e-05	610.28	0.063	3465.59				0.5	771.946	0.0424645	10.8709
										1	713.009	0.115571	29.5862
		Background	1.224e-05	6.447	2.328e-05	278.424				1.5	621.963	0.228506	58.4975
	Replicate 1	Cntrl (2 min)	1.224e-05	812.627	0.168	4197.11				2	536.451	0.334577	85.6516
800 nM		0.5 min	1.224e-05	778.393	0.219	4005.53			2	Cntrl (2)	847.044	0	0
		1 min	1.224e-05	719.456	0.252	3807.7				0.5	799.559	0.0560597	14.3513
		1.5 min	1.224e-05	628.41	0.347	3592.28				1	697.966	0.175998	45.0555
		2 min	1.224e-05	542.898	0.215	3178.63				1.5	692.556	0.182385	46.6905
	Replicate 2	Cntrl (2 min)	1.224e-05	853.491	0.37	4497.4				2	571.579	0.325207	83.2531
800 nM		0.5 min	1.224e-05	806.006	0.061	3641.61			3	Cntrl (2)	858.568	0	0
		1 min	1.224e-05	704.413	0.469	3352.89				0.5	816.388	0.0491283	12.5768
		1.5 min	1.224e-05	699.003	0.233	3413.52				1	715.731	0.166367	42.5898
		2 min	1.224e-05	578.026	0.33	3231.63				1.5	636.972	0.2581	66.0735
	Replicate 3	Cntrl (2 min)	1.224e-05	865.015	0.215	4734.74				2	579.949	0.324516	83.0761
800 nM		0.5 min	1.224e-05	822.835	0.282	4579.97
		1 min	1.224e-05	722.178	0.153	3934.99		960	1	Cntrl (2)	978.446	0	0
		1.5 min	1.224e-05	643.419	0.406	3612.55				0.5	960.456	0.0183863	4.70689
		2 min	1.224e-05	586.396	0.076	3215.19				1	838.332	0.143201	36.6593
										1.5	711.13	0.273205	69.9404
		Background	1.054e-05	4.381	2.328e-05	213.627				2	636.997	0.348971	89.3365
	Replicate 1	Cntrl (2 min)	1.054e-05	982.827	0.998	4596.31			2	Cntrl (2)	974.374	0	0
960 nM		0.5 min	1.054e-05	964.837	0.567	4832.19				0.5	923.991	0.0517081	13.2373
		1 min	1.054e-05	842.713	0.412	4511				1	819.358	0.159093	40.7278
		1.5 min	1.054e-05	715.511	0.319	3653.85				1.5	663.682	0.318863	81.629
		2 min	1.054e-05	641.378	0.303	3365.2				2	551.718	0.433772	111.046
	Replicate 2	Cntrl (2 min)	1.054e-05	978.755	0.589	4612.69			3	Cntrl (2)	993.646	0	0
960 nM		0.5 min	1.054e-05	928.372	0.681	4256.72				0.5	923.489	0.0706056	18.075
		1 min	1.054e-05	823.739	0.412	3594.02				1	792.711	0.20222	51.7683
		1.5 min	1.054e-05	668.063	0.381	2940.59				1.5	685.036	0.310583	79.5094
		2 min	1.054e-05	556.099	0.117	2672.76				2	550.184	0.446298	114.252
	Replicate 3	Cntrl (2 min)	1.054e-05	998.027	0.297	4980.9
960 nM		0.5 min	1.054e-05	927.87	0.483	4467.68		1120	1	Cntrl (1.5)	883.61	0	0
		1 min	1.054e-05	797.092	0.589	3961.07				0.5	804.894	0.0890846	22.8056
		1.5 min	1.054e-05	689.417	0.292	3683.08				1	669.766	0.242012	61.955
		2 min	1.054e-05	554.565	0.164	3020.68				1.25	573.89	0.350517	89.7323
										1.5	506.36	0.426942	109.297
		Background	1.23e-05	5.943	2.328e-05	297.584			2	Cntrl (1.5)	885.701	0	0
	Replicate 1	Cntrl (1.5 min)	1.23e-05	889.553	0.063	4975.46				0.5	814.567	0.0803138	20.5603
1120 nM		0.5 min	1.23e-05	810.837	0.013	4366.34				1	676.183	0.236556	60.5584
		1 min	1.23e-05	675.709	0.287	3755.47				1.25	623.451	0.296093	75.7998
		1.25 min	1.23e-05	579.833	0.149	3318.34				1.5	540.527	0.389718	99.7679
		1.5 min	1.23e-05	512.303	0.215	2884.86			3	Cntrl (1.5)	881.427	0	0
	Replicate 2	Cntrl (1.5 min)	1.23e-05	891.644	0.393	4577.36				0.5	802.611	0.0894186	22.8912
1120 nM		0.5 min	1.23e-05	820.51	0.406	4382.3				1	669.838	0.240053	61.4535
		1 min	1.23e-05	682.126	0.267	3120.14				1.25	580.524	0.341382	87.3937
		1.25 min	1.23e-05	629.394	0.272	3111.52				1.5	508.164	0.423476	108.41
		1.5 min	1.23e-05	546.47	0.114	3033.42
	Replicate 3	Cntrl (1.5 min)	1.23e-05	887.37	0.063	4975.46		1280	1	Cntrl (1.25)	700.726	0	0
1120 nM		0.5 min	1.23e-05	808.554	0.013	4366.34				0.25	709.264	-0.0121845	-3.11923
		1 min	1.23e-05	675.781	0.611	3755.47				0.5	619.606	0.115766	29.636
		1.25 min	1.23e-05	586.467	0.149	3318.34				1	513.445	0.267267	68.4204
		1.5 min	1.23e-05	514.107	0.215	2884.86				1.25	445.843	0.363741	93.1178
									2	Cntrl (1.25)	650.111	0	0
		Background	1.284e-05	12.064	2.328e-05	178.785				0.25	676.257	-0.0402177	-10.2957
	Replicate 1	Cntrl (1.25 min)	1.284e-05	712.79	0.098	4036.74				0.5	620.14	0.0461014	11.8019
1280 nM		0.25 min	1.284e-05	721.328	0.303	4085.94				1	530.196	0.184453	47.22
		0.5 min	1.284e-05	631.67	2.328e-05	3708.31				1.25	425.154	0.346029	88.5833
		1 min	1.284e-05	525.509	0.087	3368			3	Cntrl (1.25)	697.348	0	0
		1.25 min	1.284e-05	457.907	0.022	2755.21				0.25	673.911	0.0336088	8.60384
	Replicate 2	Cntrl (1.25 min)	1.284e-05	662.175	0.02	3907.19				0.5	616.547	0.115869	29.6625
1280 nM		0.25 min	1.284e-05	688.321	0.282	3613.13				1	505.636	0.274916	70.3785
		0.5 min	1.284e-05	632.204	0.18	3109.91				1.25	390.42	0.440136	112.675
		1 min	1.284e-05	542.26	0.287	2752.17
		1.25 min	1.284e-05	437.218	0.076	2951.59		1920	1	Cntrl (1)	891.645	0	0
	Replicate 3	Cntrl (1.25 min)	1.284e-05	709.412	0.032	3985.4				0.25	874.037	0.0197478	5.05543
1280 nM		0.25 min	1.284e-05	685.975	0.051	4142.89				0.5	813.758	0.087352	22.3621
		0.5 min	1.284e-05	628.611	0.049	3735.98				0.75	675.139	0.242816	62.161
		1 min	1.284e-05	517.7	0.065	3078.23				1	527.921	0.407925	104.429
		1.25 min	1.284e-05	402.484	0.015	2818.9			2	Cntrl (1)	910.705	0	0
										0.25	893.096	0.0193356	4.94991
		Background	9.895e-06	6.441	2.328e-05	144.827				0.5	843.994	0.073252	18.7525
	Replicate 1	Cntrl (1 min)	9.895e-06	898.086	0.626	4312.94				0.75	719.273	0.210202	53.8117
1920 nM		0.25 min	9.895e-06	880.478	0.352	4386.13				1	517.205	0.432083	110.613
		0.5 min	9.895e-06	820.199	0.347	4072.38			3	Cntrl (1)	879.594	0	0
		0.75 min	9.895e-06	681.58	0.201	3348.98				0.25	866.541	0.0148398	3.79899
		1 min	9.895e-06	534.362	0.138	2886.42				0.5	834.939	0.0507677	12.9965
	Replicate 2	Cntrl (1 min)	9.895e-06	917.146	1.444	4084.09				0.75	692.158	0.213094	54.552
1920 nM		0.25 min	9.895e-06	899.537	0.642	3850.69				1	487.137	0.44618	114.222
		0.5 min	9.895e-06	850.435	0.483	3532.95
		0.75 min	9.895e-06	725.714	0.364	3063.26		2560	1	Cntrl (0.75)	1957.53	0	0
		1 min	9.895e-06	523.646	0.267	3030.23				0.166667	1925.57	0.0163252	4.17925
	Replicate 3	Cntrl (1 min)	9.895e-06	886.035	0.341	4290.15				0.333333	1643.08	0.160633	41.1221
1920 nM		0.25 min	9.895e-06	872.982	0.252	4326.26				0.5	1371.87	0.299181	76.5904
		0.5 min	9.895e-06	841.38	0.076	4042.26				0.75	961.555	0.508791	130.25
		0.75 min	9.895e-06	698.599	0.247	3783.32			2	Cntrl (0.75)	1938.93	0	0
		1 min	9.895e-06	493.578	0.242	3226.69				0.166667	1769.92	0.0871677	22.3149
										0.333333	1513.18	0.219582	56.2131
		Background	1.284e-05	27.33	0.03	258.504				0.5	1315.32	0.321625	82.336
	Replicate 1	Cntrl (0.75 min)	1.284e-05	1984.86	3.596	8952.07				0.75	990.007	0.489405	125.288
2560 nM		0.166666667 min	1.284e-05	1952.9	3.487	9313.59			3	Cntrl (0.75)	2013.44	0	0
		0.333333333 min	1.284e-05	1670.41	6.59	8741.49				0.166667	2011.61	0.000910383	0.233058
		0.5 min	1.284e-05	1399.2	3.763	7189.51				0.333333	1757.74	0.126998	32.5114
		0.75 min	1.284e-05	988.885	0.469	5079.47				0.5	1521.28	0.244438	62.5763
	Replicate 2	Cntrl (0.75 min)	1.284e-05	1966.26	4.799	9936.5				0.75	1173.53	0.41715	106.79
2560 nM		0.166666667 min	1.284e-05	1797.25	2.692	8786.66
		0.333333333 min	1.284e-05	1540.51	2.475	7542.33		3840	1	Cntrl (0.67)	1383.18	0	0
		0.5 min	1.284e-05	1342.65	3.578	6455.62				0.166667	1195.17	0.135926	34.7971
		0.75 min	1.284e-05	1017.34	1.179	5331.5				0.333333	988.544	0.28531	73.0394
	Replicate 3	Cntrl (0.75 min)	1.284e-05	2040.77	1.444	9660.43				0.5	754.104	0.454804	116.43
2560 nM		0.166666667 min	1.284e-05	2038.94	5.387	9481.99				0.67	454.112	0.67169	171.953
		0.333333333 min	1.284e-05	1785.07	2.296	7963.77			2	Cntrl (0.67)	1400.32	0	0
		0.5 min	1.284e-05	1548.61	0.503	6862.72				0.166667	1126.81	0.195316	50.0009
		0.75 min	1.284e-05	1200.86	0.705	4739.39				0.333333	896.445	0.359827	92.1156
										0.5	716.577	0.488275	124.998
		Background	1.435e-05	26.825	2.328e-05	453.445				0.67	420.46	0.699739	179.133
	Replicate 1	Cntrl (0.67 min)	1.435e-05	1410	1.117	7836.82			3	Cntrl (0.67)	1348.45	0	0
3840 nM		0.166666667 min	1.435e-05	1221.99	0.95	7145.39				0.166667	1113.17	0.174481	44.6673
		0.333333333 min	1.435e-05	1015.37	0.788	6335.99				0.333333	883.882	0.344519	88.1967
		0.5 min	1.435e-05	780.929	0.649	4892.75				0.5	671.706	0.501867	128.478
		0.67 min	1.435e-05	480.937	0.885	3065.4				0.67	413.945	0.693021	177.413
	Replicate 2	Cntrl (0.67 min)	1.435e-05	1427.14	0.172	8312.87
3840 nM		0.166666667 min	1.435e-05	1153.64	0.319	6612.41		5120	1	Cntrl (0.67)	1456.17	0	0
		0.333333333 min	1.435e-05	923.27	0.228	5417.82				0.166667	1078.33	0.259479	66.4265
		0.5 min	1.435e-05	743.402	0.574	3871.08				0.333333	792.83	0.455537	116.618
		0.67 min	1.435e-05	447.285	0.358	2727.93				0.5	537.76	0.630702	161.46
	Replicate 3	Cntrl (0.67 min)	1.435e-05	1375.27	1.409	7983.59				0.67	207.615	0.857424	219.501
3840 nM		0.166666667 min	1.435e-05	1139.99	0.746	6409.95			2	Cntrl (0.67)	1396.13	0	0
		0.333333333 min	1.435e-05	910.707	0.559	5736.34				0.166667	1095.91	0.215036	55.0492
		0.5 min	1.435e-05	698.531	0.476	4408.53				0.333333	901.308	0.354425	90.7329
		0.67 min	1.435e-05	440.77	0.754	2687.75				0.5	549.461	0.606441	155.249
										0.67	203.824	0.854008	218.626
		Background	1.537e-05	34.959	2.328e-05	459.011			3	Cntrl (0.67)	1416.94	0	0
	Replicate 1	Cntrl (0.67 min)	1.537e-05	1491.13	0.567	8711.74				0.166667	1151.46	0.18736	47.9641
5120 nM		0.166666667 min	1.537e-05	1113.28	0.611	6908.37				0.333333	820.828	0.420702	107.7
		0.333333333 min	1.537e-05	827.789	0.596	5167.19				0.5	586.838	0.58584	149.975
		0.5 min	1.537e-05	572.719	1.066	3628.81				0.67	265.165	0.81286	208.092
		0.67 min	1.537e-05	242.574	0.224	1532.95
	Replicate 2	Cntrl (0.67 min)	1.537e-05	1431.09	0.705	7781.39
5120 nM		0.166666667 min	1.537e-05	1130.87	1.538	5938.36
		0.333333333 min	1.537e-05	936.267	1.232	5511.27
		0.5 min	1.537e-05	584.42	0.604	3557.66
		0.67 min	1.537e-05	238.783	0.197	1804.34
	Replicate 3	Cntrl (0.67 min)	1.537e-05	1451.89	0.431	9709.82
5120 nM		0.166666667 min	1.537e-05	1186.42	0.604	7962.05
		0.333333333 min	1.537e-05	855.787	0.673	6016.71
		0.5 min	1.537e-05	621.797	0.841	4142.89
		0.67 min	1.537e-05	300.124	0.257	1978.47
