# Supplementary material for: Tetramerisation of the CRISPR ring nuclease Crn3/Csx3 facilitates cyclic oligoadenylate cleavage
Source: eLife. 2020 Jun 29;9:e57627. doi: 10.7554/eLife.57627 (PMC7371418; doi:10.7554/eLife.57627)
Supplement: Supplementary file 2. [file elife-57627-supp2.docx]

**Supplementary Table 2.** *Dynamic light scattering studies with AfCsx3.*In the absence of cA4, AfCsx3 (80 µM) forms particles with a molecular weight of ~36 ± 9 kDa consistent with protein in a homodimeric state. When an equimolar amount of cA4 is added, Csx3 forms multiple large molecular weight species (three species detected in each replicate) with significantly greater particles sizes (denoted by increase in the particle Z-average). The mass (%) per volume of each of these species is indicated alongside its molecular weight.

| Replicate | **AfCsx3** | | | **AfCsx3 + cA4** | | |
| --- | --- | --- | --- | --- | --- | --- |
| Est. MW (kDa) | Mass (%) | Z-Average (nm) | Est. MW (kDa) | Mass (%) | Z-Average (nm) |
| 1 | 36.3 ± 8.8 | 100 | 5.53 ± 1.33 | 453 ± 10.1 | 66.2 | 16.2 ± 0.361 |
| 561 ± 12.3 | 31.6 | 17.8 ± 0.368 |
| 438 ± 102 | 0.3 | 42.9 ± 0.667 |
| 2 | 37.7 ± 9.5 | 100 | 5.55 ± 1.44 | 237 ± 14.5 | 32.8 | 12.3 ± 0.722 |
| 504 ± 13.4 | 33.1 | 17.0 ± 0.348 |
| 10400 ± 706 | 29.5 | 62.0 ± 4.07 |
| 3 | 36.4 ± 9.0 | 100 | 5.51 ± 1.37 | 50.7 ± 2.60 | 33.2 | 6.45 ± 0.326 |
| 1810 ± 124 | 30 | 29.6 ± 1.60 |
| 4080 ± 333 | 32.4 | 54.8 ± 0.940 |
